# Supplementary material
Source: PubMed Central journal article supplement (PMC5910206)
Supplement: NIHMS938614-supplement-7.pdf [file NIHMS938614-supplement-7.pdf]

1 Supplementary Material for “Mapping Population-based  
2 Structural Connectomes”

3 Zhengwu Zhang<sup>a,b</sup>, Maxime Descoteaux<sup>c</sup>, Jingwen Zhang<sup>d</sup>, Gabriel Girard<sup>c</sup>,  
4 Maxime Chamberland<sup>c</sup>, David Dunson<sup>a</sup>, Anuj Srivastava<sup>e</sup>, Hongtu Zhu<sup>f,d</sup>

5 <sup>a</sup>*Department of Statistical Science, Duke University, Durham, USA*

6 <sup>b</sup>*Statistical and Applied Mathematical Sciences Institute, Durham, USA*

7 <sup>c</sup>*Computer Science Department, Faculty of Science, University of Sherbrooke,  
8 Sherbrooke, QC, Canada*

9 <sup>d</sup>*Department of Biostatistics, University of North Carolina at Chapel Hill, Chapel Hill,  
10 NC, USA*

11 <sup>e</sup>*Department of Statistics, Florida State University, Tallahassee, FL, USA*

12 <sup>f</sup>*Department of Biostatistics, University of Texas MD Anderson Cancer Center,  
13 Houston, TX, USA*

---

---

14 **1. Gray Matter Dilation**

15 Figure 1 illustrates the effect of the dilation procedure in PSC pipeline.  
16 PSC contains an iterative dilation procedure, i.e. each time, we dilate the  
17 current gray matter (GM) ROIs to white matter (WM) region by 1 voxel; if  
18 there are  $\psi$  ( $\psi > 1$ ) voxels to dilate, we perform such dilation iteratively  $\psi$   
19 times. The procedure for dilating 1 voxel is given in Algorithm 1.

20 **2. Calculation of Connected Surface Area (CSA) Feature**

21 From the definition of the CSA feature, we can easily identify that it con-  
22 tains an area measure. In order to calculate the CSA, we need to identify the  
23 surface of an ROI and the intersections of the surface and streamlines. The  
24 ROI is composed of a set of 3D voxels. In our implementation, for simplicity,  
25 the total surface area of such ROI is approximated by the number of voxels  
26 in the boundary of this ROI. Figure 2 (a) illustrates a 2D ROI example, and

---

**Algorithm 1:** Dilation of one voxel from GM ROI to WM regions

---

- 1 Input:** One parcellation containing GM ROI and WM labels.
1. Identify all the white matter voxels in this parcellation.
  2. For each white matter voxel, treat it as a center and draw a square window (with size  $5 \times 5 \times 5$ ) to extract its neighborhood label information.
    - (a) Analyze the label information in the window to cluster the center white matter voxel.
    - (b) If there is no gray matter label in the neighborhood, return the original white matter label.
    - (c) If there are one or more gray matter labels. Sort the gray matter labels based on its occurrence. From the most frequent one, calculate the distances of these gray matter voxels to current center white matter voxel, if the minimal distance is smaller than  $\sqrt{3}$ , assign the white matter voxel to this gray matter one. Otherwise, continue for the next frequent gray matter voxel. If none of the minimal distance is smaller than  $\sqrt{3}$ , return the original white matter label.
  3. Assign the centered white matter voxel with the returned label.
- 

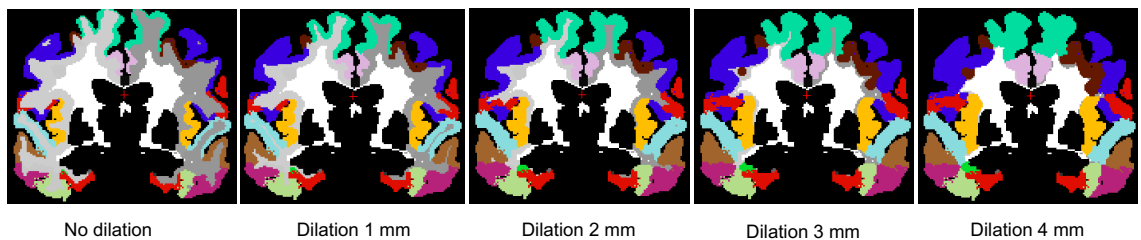

Figure 1: Illustration of gray matter dilation.

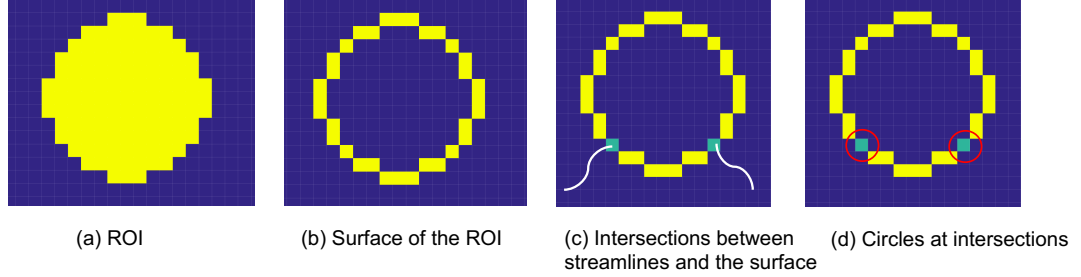

Figure 2: Illustration of calculating the CSA for a given ROI.

27 its area is approximated by the number of voxels in the boundary in (b) (the  
 28 approximation precision is related to the size of the voxel). For a fixed circle  
 29 size, i.e. radius  $r$  fixed, Algorithm 2 describes how to calculate the CSA  
 30 feature.

---

**Algorithm 2:** Extraction of CSA feature

---

- 1 **Input:** Two ROIs  $V_1$  and  $V_2$ , the streamlines connecting these two ROIs, and the circle radius  $r$ . Each ROI contains a set of voxels,  $V_i = \{v_1, \dots, v_{n_i}\}$  for  $i = 1, 2$ , where each  $v_j$  is a voxel in 3D space.
1. Identify the voxels in the contours of two ROIs  $V_1$  and  $V_2$  (illustrated in Figure 2 (b)), denoted as  $BV_1$  and  $BV_2$ . For each ROI, identify the subset of voxels that intersect with the streamlines connecting two ROIs on the surface (illustrate in Figure 2 (c)). Denote the voxels at the intersection as  $IV_1$  and  $IV_2$ .
  2. At each intersection voxel  $v_j \in IV_i$  for  $i = 1, 2$ , draw a sphere with a fixed radius  $r$  and with its center overlapped with the center of  $v_j$ . Record the voxels within this sphere in the set of  $SphV_{v_j}$ .
  3. The union of  $\cup_{v_j} SphV_{v_j}$  for  $v_j \in IV_1 \cup IV_2$  contains all voxels of the proposed CSA feature. The number of voxels (or the volume) in  $\cup_{v_j} SphV_{v_j}$  is deemed as our CSA feature.
-

### 31 **3. Different Distance Metrics for Comparing Weighted Networks.**

In the main paper, we only use the  $\mathbb{L}^2$  metric to calculate dICC scores for various weighted networks extracted from the PSC framework. Here, we are interested in exploring the reproducibility scores under the combination of different metrics and transformations of weighted networks. The goal is to identify the combination of metric and transformation that has the best reproducibility for weighted network analysis. The following distances are used:

$$\begin{aligned}d_{w1} &= \|A_1 - A_2\|, & d_{w2} &= \|\widehat{A}_1 - \widehat{A}_2\|, \\d_{w3} &= |A_1 - A_2|, & d_{w4} &= |\widehat{A}_1 - \widehat{A}_2|,\end{aligned}$$

32 where  $\|\cdot\|$  is the  $\mathbb{L}^2$  metric,  $|\cdot|$  is the  $\mathcal{L}^1$  metric, and  $\widehat{A}$  is the logarithm  
33 transform of  $A$  such that  $\widehat{A}(a, b) = \log(A(a, b) + 1)$ . Table 1 presents the result  
34 of dICC calculated using different distances with the test-retest dataset. By  
35 comparing the different distances, we find that  $d_{w1}$  almost always has the  
36 highest dICC score. Therefore, to achieve the best discriminative power, we  
37 recommend to use the raw weighted matrix with the  $\mathbb{L}^2$  metric for weighted  
38 network analysis.

### 39 **4. More Results for the Compression Procedure**

#### 40 *4.1. Simulation study for representation efficiency of PTCS*

41 In this section, we perform a simulation study to illustrate the repre-  
42 sentation efficiency of the proposed parcellation-based tractography common  
43 space (PTCS) algorithm.

44 We want to illustrate how the variation decomposition (alignment) pro-  
45 cess and functional principal component analysis (FPCA) can efficiently rep-  
46 resent all streamlines connecting a pair of brain regions. We first simulated

Table 1: Comparison of reproducibility (dICC score) of different distances. The highest dICC score calculated under each distance is bold.

| Features       | $V = 68$    |             |             |             | $V = 148$   |             |             |             |
|----------------|-------------|-------------|-------------|-------------|-------------|-------------|-------------|-------------|
|                | $d_{w1}$    | $d_{w2}$    | $d_{w3}$    | $d_{w4}$    | $d_{w1}$    | $d_{w2}$    | $d_{w3}$    | $d_{w4}$    |
| PSC Mean FA    | .462        | .450        | .442        | .435        | .577        | .574        | .421        | .417        |
| PSC Max FA     | .389        | .394        | .387        | .390        | .541        | .546        | .378        | .382        |
| PSC Cluster #  | .798        | .711        | .573        | .480        | .755        | <b>.690</b> | .490        | .438        |
| PSC Ave. Len.  | .519        | .477        | .563        | .560        | .539        | .542        | .443        | .441        |
| PSC Count      | .791        | .712        | .700        | .551        | .731        | .677        | .649        | .515        |
| PSC CSA        | <b>.808</b> | .670        | <b>.715</b> | .534        | <b>.762</b> | .678        | <b>.668</b> | .500        |
| PSC wCSA       | .751        | <b>.750</b> | .669        | <b>.667</b> | .666        | .663        | .607        | <b>.605</b> |
| General Count  | .403        | .695        | .578        | .588        | .545        | .669        | .578        | .531        |
| General Binary | -           | -           | .434        | -           | -           | -           | .426        | -           |

200 streamlines with similar shapes, but random lengths, translations, rotations and re-parameterizations. To be more specific, we extracted 200 streamlines connecting left occipital and right occipital (they have similar shapes). The 200 streamlines were then aligned by removing the scaling, translation, rotation and re-parameterization. Next, 200 randomly generated scalings, translations, rotations and re-parameterizations were applied to these streamlines. Figure 3 shows these simulated curves.

The simulated streamlines were then aligned by separating different shape confounding parameters, including (1) translations only, (2) rotations and translations, and (3) separating rotations, translations and re-parameterizations. Fig. 4 shows the alignment results under the three scenarios. It indicates that by separating more shape confounding variables from the shape component, it leads to tighter residual shape information, and therefore reduces the number of basis functions needed to represent each streamline. Under each scenario, we performed fPCA, learned a set of basis functions from the aligned streamlines, and represented all streamlines by using the learnt basis func-

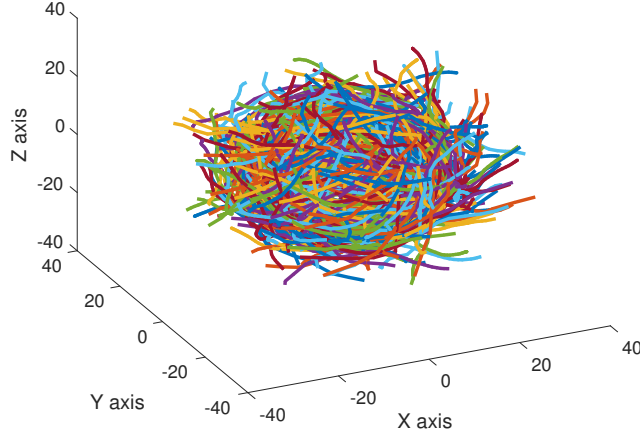

Figure 3: The 200 simulated streamlines.

63 tions. Let  $f_i$  be the raw streamlines and  $\hat{f}_{i,M}$  be the reconstructed stream-  
 64 lines obtained by using the first  $M$  number of fPCA basis functions for each  
 65 coordinate. We measure the difference between  $f_i$  and  $\hat{f}_{i,M}$  by using the in-  
 66 tegrated squared error (ISE) defined as  $\text{ISE}_i(M) = \sqrt{\int_0^1 |\hat{f}_{i,M}(s) - f(s)|^2 ds}$ .  
 67 As expected, increasing  $M$  and separating more shape confounding variables  
 68 reduces  $\text{ISE}_i(M)$ . See the right panel of Fig. 4 for details. Under scenario  
 69 (3), we do not need the re-parameterization in order to recover the origi-  
 70 nal streamline path. Another issue with scenario (3) is that, under a naive  
 71 implementation, it is time consuming to separate the re-parameterization  
 72 (Srivastava et al., 2011). To speed up the alignment process, we can ei-  
 73 ther use a fast approximate alignment procedure (Huang et al., 2016) under  
 74 scenario (3) or only separate out rotation and translation under scenario (2).

#### 75 4.2. Robustness of the PTCS

76 To future test the robustness of the learnt PTCS from HCP subjects,  
 77 we run our PSC pipeline in three other datasets with relatively low image

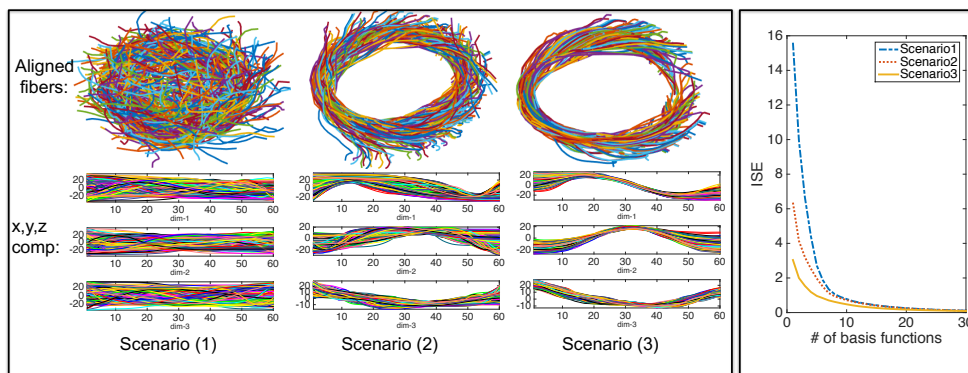

Figure 4: Comparison of the representation efficiency at different scenarios of separating shape confounding parameters.

78 quality. To be specific, we used 20 HCP subjects as the training data, and  
 79 learnt a template fiber and set of basis functions to compress the stream-  
 80 lines. For the convenience of compression, here we used the three connections  
 81 (L28,R28), (L3, R28), (LS9, R23) (based on the Desikan-Killiany parcella-  
 82 tion) as presented in the main paper.

83 Three subjects from three different datasets were used.

- 84 1. Sherbrooke Test-Retest Dataset: As presented in the main paper, DTI  
 85 image in this dataset was acquired along 64 uniformly distributed di-  
 86 rections with a  $b$ -value of  $b = 1000 \text{ s/mm}^2$  and a single  $b_0 (=0 \text{ s/mm}^2)$   
 87 image. Scans were done by using the single-shot echo-planar imaging  
 88 sequence on a 1.5 Tesla Siemens MAGNETOM ( $128 \times 128$  matrix, 2  
 89  $\text{mm}$  isotropic resolution, TR/TE 11000/98 ms and GRAPPA factor 2).
- 90 2. Philadelphia Neurodevelopmental Cohort (PNC) Dataset: The diffu-  
 91 sion space ( $q$ -space) was acquired along 32 uniformly distributed di-  
 92 rections with a  $b$ -value of  $b = 1000 \text{ s/mm}^2$  and 4  $b_0 (=0 \text{ s/mm}^2)$   
 93 images (Satterthwaite et al., 2016). Scans were done by using a single

94 3T Siemens TIM Trio whole-body scanner using the VB17 revision of  
95 the Siemens software. Each DTI image has the isotropic resolution of  
96  $1.875 \times 1.875 \times 2 \text{ mm}^3$ . Signal excitation and reception were obtained  
97 using a quadrature body coil for transmit and a 32-channel head coil  
98 for receive.

99 3. High Resolution DTI: DTI image in this dataset has a high SNR and  
100 sub-millimeter isotropic resolution (specifically:  $0.85 \times 0.85 \times 0.85 \text{ mm}^3$ )  
101 (Chang et al., 2015). Images was scanned from a 3 Tesla clinical MRI  
102 scanner (MR750, General Electric, Waukesha, WI, USA), equipped  
103 with an 8-channel head coil. The diffusion space ( $q$ -space) was acquired  
104 along 12 uniformly distributed directions with a  $b$ -value of  $b = 800$   
105  $s/mm^2$  and 1  $b_0 (=0 s/mm^2)$  image.

106 All images from these datasets were processed using our PSC framework.  
107 Streamlines of each subject were extracted and saved for compression. Table  
108 3 (in this letter) shows the compression result. The results for the Sherbrooke  
109 Test-Retest and the PNC datasets are based  $n = 5$  subjects, and the results  
110 for high resolution DTI dataset are based on only 1 subject since we only  
111 obtained one from our collaborators now. Table 3 shows the compression  
112 result. Compared with the HCP data, we observe a slightly decreasing of the  
113 compression power (which is normal because the PTCS is learned based on  
114 the HCP datasets). Tractography data constructed from the PNC subjects  
115 have the worst quality because of the image resolution (spatial resolution  
116 and  $q$ -space resolution). However, using the basis functions learned from the  
117 HCP dataset, our compression method still can achieve good compression  
118 rates. Figure 5 shows tracts before and after compression from one PNC  
119 subject.



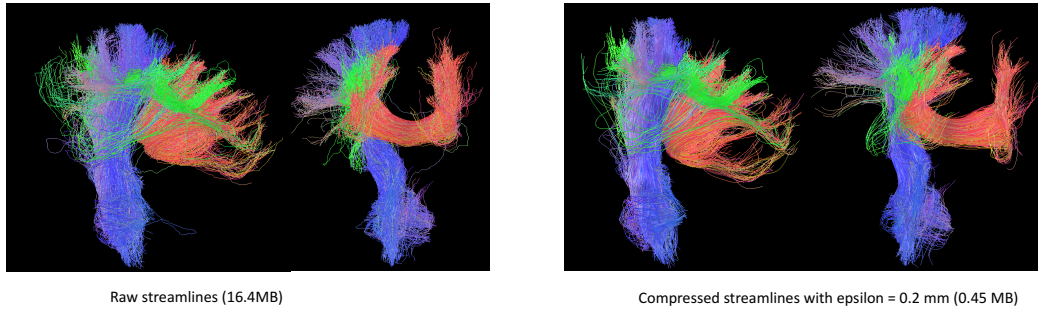

Figure 5: Evaluation of the proposed compression method with one PNC subject. The basis functions were learned using the HCP subjects. Here we directly applied the learned basis to represent the streamlines extracted from one PNC subject. Similar compression power is observed comparing with the HCP result.

Table 2: Compression ratios (in percentage) of tractography generated from data in three different sites. Standard deviation is shown in the subscript parenthesis.

| $\ \epsilon\ $ (mm) | Connection ( <i>LS9, R23</i> ) |                      |                      |                      | Connection ( <i>L3, R28</i> ) |                      |                      |                      | Connection ( <i>L28, R28</i> ) |                      |                      |                      |
|---------------------|--------------------------------|----------------------|----------------------|----------------------|-------------------------------|----------------------|----------------------|----------------------|--------------------------------|----------------------|----------------------|----------------------|
|                     | 0.1                            | 0.2                  | 0.5                  | 2.0                  | 0.1                           | 0.2                  | 0.5                  | 2.0                  | 0.1                            | 0.2                  | 0.5                  | 2.0                  |
| Sherbrooke (n=5)    | 95.6 <sub>(.2)</sub>           | 97.3 <sub>(.1)</sub> | 98.6 <sub>(.1)</sub> | 99.1 <sub>(.1)</sub> | 95.5 <sub>(.1)</sub>          | 97.2 <sub>(.1)</sub> | 98.4 <sub>(.1)</sub> | 98.9 <sub>.0</sub>   | 95.8 <sub>(.1)</sub>           | 97.6 <sub>(.0)</sub> | 98.7 <sub>(.1)</sub> | 99.2 <sub>(.0)</sub> |
| PNC (n=5)           | 95.2 <sub>(.1)</sub>           | 97.2 <sub>(.1)</sub> | 98.5 <sub>(.1)</sub> | 99.1 <sub>(.1)</sub> | 95.2 <sub>(.2)</sub>          | 97.1 <sub>(.1)</sub> | 98.3 <sub>(.1)</sub> | 98.8 <sub>(.1)</sub> | 95.2 <sub>.1</sub>             | 97.3 <sub>(.1)</sub> | 98.6 <sub>.1</sub>   | 99.2 <sub>.0</sub>   |
| High Res (n=1)      | 95.5                           | 97.3                 | 98.6                 | 99.1                 | 96.6                          | 97.8                 | 98.8                 | 99.3                 | 95.1                           | 97.4                 | 98.6                 | 99.2                 |

Table 3: Mean diffusion integrity changes (%) after compression in each connection

| $\ \epsilon\ $ (mm) | (LS9, R23) |     |     |     | (L3, R28) |     |     |     | (L28, R28) |     |      |     |
|---------------------|------------|-----|-----|-----|-----------|-----|-----|-----|------------|-----|------|-----|
|                     | 0.1        | 0.2 | 0.5 | 2.0 | 0.1       | 0.2 | 0.5 | 2.0 | 0.1        | 0.2 | 0.5  | 2.0 |
| FA                  | .03        | .06 | .46 | 6.1 | .05       | .15 | .50 | 2.5 | .05        | .08 | 0.38 | 5.1 |
| MD                  | .01        | .02 | .10 | 2.3 | .01       | .02 | .07 | .64 | .01        | .06 | .58  | 2.9 |

120 *4.3. Impact of Diffusion Measures Along Bundles After Compression*

121 In this section, we are interested in studying the impact of the compres-  
 122 sion of streamlines to the diffusion measures along them. Taking FA and MD  
 123 measures as one example, we performed additional experiments to explore  
 124 how the new representation of streamlines can impact the integrity of diffu-  
 125 sivity information along fiber bundles that connect any two regions. Table 3  
 126 shows the percentage of mean FA and MD changes after compressing along  
 127 the three selected connections shown in Figure 9 in the main paper. The  
 128 percentage is calculated based  $100 * |v_{bf} - v_{af}|/v_{bf}$ , where  $v_{bf}$  represents the  
 129 value before compressing and  $v_{af}$  represents the value after compressing.

130 **5. Heritability of Weighted Structural Network**

131 In Table 4, we show more details about the selected 28 significant connec-  
 132 tions with heritability scores greater than 0.8, the heritability score  $h^2$ , the  
 133 ROI names and the adjusted p-values. This analysis used mean FA weight  
 134 matrix (under the Desikan-Killiany parcellation) as the phenotype of interest.

Table 4: Selected connections with heritability larger than 0.8. The p-values are adjusted by Bonferroni correction.  $h^2$  is referred as the heritability score. This analysis used mean FA weight matrix (under the Desikan-Killiany parcellation) as the phenotype of interest.

| ROI1                          | ROI2                          | $h^2$ | p-value   |
|-------------------------------|-------------------------------|-------|-----------|
| L10 (lh-lateraloccipital)     | R20 (rh-pericalcarine)        | 0.976 | <6.27E-14 |
| L28 (lh-superiorparietal)     | R4 (rh-cuneus)                | 0.971 | <6.27E-14 |
| L34 (lh-insula)               | R28 (rh-superiorparietal)     | 0.966 | <6.27E-14 |
| L34 (lh-insula)               | R9 (rh-isthmuscingulate)      | 0.959 | <6.27E-14 |
| L20 (lh-pericalcarine)        | R28 (rh-superiorparietal)     | 0.954 | <6.27E-14 |
| L24 (lh-precuneus)            | R4 (rh-cuneus)                | 0.954 | <6.27E-14 |
| L28 (lh-superiorparietal)     | R10 (rh-lateraloccipital)     | 0.952 | <6.27E-14 |
| L31 (lh-frontalpole)          | R31 (rh-frontalpole)          | 0.952 | <6.27E-14 |
| L3 (lh-caudalmiddlefrontal)   | R3 (rh-caudalmiddlefrontal)   | 0.95  | <6.27E-14 |
| L7 (lh-inferiorparietal)      | R28 (rh-superiorparietal)     | 0.944 | <6.27E-14 |
| L20 (lh-pericalcarine)        | R20 (rh-pericalcarine)        | 0.944 | <6.27E-14 |
| L28 (lh-superiorparietal)     | R20 (rh-pericalcarine)        | 0.937 | <6.27E-14 |
| L16 (lh-paracentral)          | R23 (rh-precentral)           | 0.928 | <6.27E-14 |
| L7 (lh-inferiorparietal)      | R24 (rh-precuneus)            | 0.918 | 1.39E-13  |
| R8 (rh-inferiortemporal)      | R11 (rh-lateralorbitofrontal) | 0.906 | 7.65E-13  |
| L31 (lh-frontalpole)          | R27 (rh-superiorfrontal)      | 0.904 | 2.09E-13  |
| L9 (lh-isthcingulate)         | R28 (rh-superiorparietal)     | 0.902 | 2.16E-12  |
| L7 (lh-inferiorparietal)      | L24 (lh-precuneus)            | 0.901 | 1.87E-10  |
| L10 (lh-lateraloccipital)     | R9 (rh-isthcingulate)         | 0.884 | 1.29E-10  |
| R14 (rh-midtemporal)          | R26 (rh-rostmidfrontal)       | 0.876 | 2.01E-10  |
| L1 (lh-bankssts)              | L17 (lh-parsopercularis)      | 0.874 | 1.55E-09  |
| L34 (lh-insula)               | R27 (rh-superiorfrontal)      | 0.873 | 2.07E-09  |
| L4 (lh-cuneus)                | R20 (rh-pericalcarine(54))    | 0.866 | 3.44E-08  |
| L15 (lh-parahippocampal)      | L20 (lh-pericalcarine)        | 0.856 | 7.59E-08  |
| L10 (lh-lateraloccipital)     | L34 (lh-insula)               | 0.827 | 8.34E-07  |
| L24 (L-precuneus)             | L29 (lh-superiortemporal)     | 0.811 | 4.83E-07  |
| L11 (lh-lateralorbitofrontal) | L17 (lh-parsopercularis)      | 0.811 | 4.19E-06  |
| L28 (lh-superiorparietal)     | R28 (rh-superiorparietal)     | 0.804 | 5.99E-06  |

- 135 Chang, H.C., Sundman, M., Petit, L., Guhaniyogi, S., Chu, M.L., Petty,  
136 C., Song, A.W., Chen, N.k., 2015. Human brain diffusion tensor imag-  
137 ing at submillimeter isotropic resolution on a 3tesla clinical mri scanner.  
138 *NeuroImage* 118, 667–675.
- 139 Huang, W., Gallivan, K.A., Srivastava, A., Absil, P.A., 2016. Riemannian  
140 optimization for registration of curves in elastic shape analysis. *Journal of*  
141 *Mathematical Imaging and Vision* 54, 320–343.
- 142 Satterthwaite, T.D., Connolly, J.J., Ruparel, K., Calkins, M.E., Jackson, C.,  
143 Elliott, M.A., Roalf, D.R., Hopson, R., Prabhakaran, K., Behr, M., et al.,  
144 2016. The philadelphia neurodevelopmental cohort: a publicly available  
145 resource for the study of normal and abnormal brain development in youth.  
146 *Neuroimage* 124, 1115–1119.
- 147 Srivastava, A., Klassen, E., Joshi, S., Jermyn, I., 2011. Shape analysis of  
148 elastic curves in Euclidean spaces. *IEEE Trans. Pattern Anal. Mach. Intell.*  
149 33, 1415–1428.
